# Supplementary material
Source: PubMed Central journal article supplement (PMC10814394)
Supplement: Supplementary_material_Cats_of_Australia_Survey.pdf [file Supplementary_material_Cats_of_Australia_Survey.pdf]

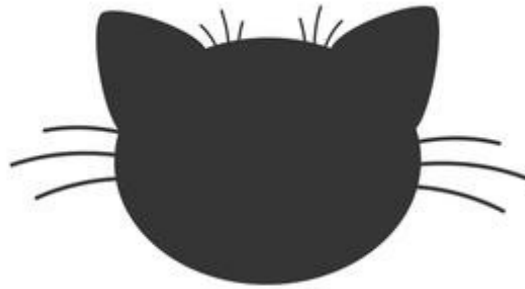

# Cats of Australia

---

## Page 1: Survey Introduction

The purpose of this survey is to collect information about the lifestyle and environment of pet cats in Australia. The survey contains 25 questions and will take approximately 10 -15 minutes to complete.

The survey is being conducted by veterinarian Dr Gabby Lawson, and information obtained will be used for the dissertation component of a post graduate Masters degree in International Animal Welfare, Ethics and Law at The University of Edinburgh. All survey responses are anonymous and confidential and will be used only in relation to this research. By completing this survey you are giving your consent for the researcher to use any data supplied in a Masters dissertation thesis and potential publications in the scientific press.

Survey participants must be Australian residents over the age of 18 years, and must be the owner of at least one pet cat. Please only complete one survey per household.

The survey will close on the 28th February 2017.

Thankyou for your participation in this survey, your information is very important for contributing to the improvement of the health and care of cats in Australia.

## Page 2: Section One

1. How many cats do you currently own? \* *Required*

- 1
- 2
- 3
- 4
- 5
- 6
- 7
- 8
- 9
- 10+

2. Where did you hear about this survey? Select all that apply: \* *Required*

- Friend or family member
- Internet
- Newspaper or magazine
- Social media
- Vet
- Other

2.a. If you selected Other, please specify:

## Lifestyle

This section will ask questions about your cat or **ALL** of your cats. For multi cat households please choose an answer which best fits the **majority** of your cats.

3. Where does your cat(s) spend its time? \* *Required*

- 100% indoor
- Indoor with access to outdoor enclosed cat run/area
- Indoor with supervised outdoor access restrained on a harness
- Mostly indoor, with supervised outdoor access only
- Indoor of a night and free access to outdoors during the day
- Indoor and outdoor, free access to both most of the time
- Mostly outdoors

4. If your cat(s) is allowed outdoors where does your cat(s) go?

- Balcony/terrace/deck
- Cat enclosure
- Enclosed yard
- Unenclosed yard - suburban area
- Unenclosed yard - semi rural area
- Unenclosed yard - rural area
- Not applicable - 100% indoors

5. Where in your house is your cat(s) allowed access to?

- 1 room
- 2-3 rooms
- Greater than 3 rooms
- No rooms - outside cat

5.a. If you answered 1 room please specify which room:

6. Does your cat(s) have access to any of the following indoor structures? Select all that apply:

- Low furniture (eg couch, chair, bed)
- High furniture (eg wardrobe, tables, book shelves)
- Window sills
- Cat/dog bed
- Cat tower/tree
- Cat shelves/platforms/ramps (those designed specifically for cats)
- Scratching post
- None of the above

7. Does your cat(s) show any inappropriate scratching behaviours (for example scratching furniture, carpet)?

- Yes - one of my cats does often
- Yes - one of my cats does sometimes
- Yes - one of my cats does rarely
- Yes - more than one of my cats does often
- Yes - more than one of my cats does sometimes

Yes - more than one of my cats does rarely

No

## Toileting

This section will ask questions about your cat or **ALL** of your cats. For multi cat households please choose an answer which best fits the **majority** of your cats.

8. What is the total number of litter tray(s) in your house?

- 1
- 2
- 3
- 4
- 5
- 6
- 7
- 8
- 9
- 10+
- None - toilets elsewhere

8.a. If you answered None - toilets elsewhere, please specify where:

9. Where are your cat(s) litter tray(s) located?

- Together - litter trays are located in the same room of the house
- Not together - litter trays are located in different rooms of the house

Not applicable - toilets elsewhere

9.a. Please list the location of each litter tray:

10. What size is the litter tray in relation to the size of your **largest** cat (length of cat is measured from the nose to the base of the tail)?

- Less than the length of my cat
- Approximately the length of my cat
- Greater than the length of my cat
- Not applicable - toilets elsewhere

11. What type of litter do you provide for your cat(s)? Select all that apply:

- Recycled paper pellets
- Clumping clay
- Non clumping clay
- Crystal litter (eg silica gel)
- Scented litter
- Wood pellets
- Newspaper/paper
- Dirt/soil
- Other
- Not applicable - toilets elsewhere

11.a. If you selected Other, please specify:



12. What quantity of litter do you use in the litter tray(s)?

- Less than 1 cm deep
- Approximately 1-3 cm deep
- Greater than 3 cm deep
- Not applicable - toilets elsewhere

13. How often are the litter trays cleaned of faeces/poo?

- Remove faeces/poo after one poo
- Remove faeces/poo after several poos
- Remove faeces/poo weekly
- Remove faeces/poo less than once weekly
- Not applicable - toilets elsewhere

14. How often are the litter trays cleaned of urine/wet litter?

- Remove wet litter daily
- Remove wet litter a few times per week
- Remove wet litter weekly
- Remove wet litter less than once weekly
- Not applicable - toilets elsewhere

## Page 5

This question applies to cats that normally toilet outside and also cats that are provided with litter trays in the house.

15. Does your cat(s) urinate/wee in areas of the house that are outside of the litter tray (for example on the bed, carpet)?

- Yes - approximately weekly
- Yes - approximately monthly
- Yes - approximately less than monthly
- No

16. Has your cat(s) ever had any urinary problems (for example straining to urinate, blood in the urine, vocalising when urinating, blocked bladder)?

- Yes - one of my cats has had urinary problems
- Yes - more than one of my cats has had urinary problems
- No

17. Has anyone provided you with advice about litter trays and litter management? Select all that apply:

- Breeder
- Friend or family member
- Internet
- Pet shop
- Rescue or welfare organisation
- Vet
- No

Other

17.a. If you selected Other, please specify:

## Feeding

This section will ask questions about your cat or **ALL** of your cats. For multi cat households please choose an answer which best fits the **majority** of your cats.

18. Which **ONE** of the following do you mostly feed your cat(s)?

- Dry cat food
- Wet cat food
- Home cooked food
- Chopped up raw meat, mince or seafood
- Large chunks of raw meat or meat on the bone
- Other

18.a. If you selected Other, please specify:

19. What else do you feed your cat(s)? Select all that apply:

- Dry cat food
- Wet cat food
- Home cooked food
- Chopped up raw meat, mince or seafood
- Large chunks of raw meat or meat on the bone
- Other

19.a. If you selected Other, please specify:

20. What method do you use to feed your cat(s)? Select all that apply:

- Bowl or plate
- Double sided bowl
- Interactive food puzzles or food dispensing toys
- Scatter or hide food in different locations
- Other

20.a. If you selected Other, please specify:

21. Where do you obtain advice about what and how to feed your cat(s)? Select all that apply:

- Breeder
- Friend or family member
- Internet
- Pet shop
- Rescue or welfare organisation
- Vet
- Other

21.a. If you selected Other, please specify:

## About You

22. In which area of Australia do you live?

- ACT
- NSW
- NT
- QLD
- SA
- TAS
- VIC
- WA

23. Please enter your postcode:

24. How much do you know about cats?

- I have little experience and/or knowledge about cats
- I have some experience and/or knowledge about cats
- I have a lot of experience and/or knowledge about cats

25. Would you like to provide any additional information about your cats? Or do you have any further comments about the survey?

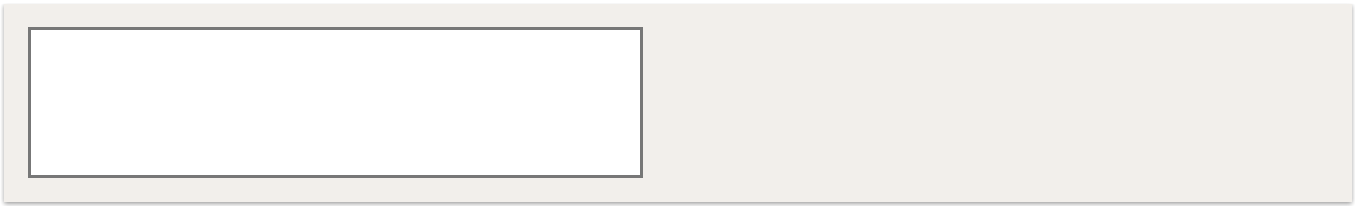



## Page 8

Thank you for completing this survey.

If you have any questions about this survey, or wish to remove your data prior to the 28th February 2017, please contact Dr Fritha Langford, Programme Director, Online MSc International Animal Welfare, Ethics and Law, The University of Edinburgh, email: [fritha.langford@ed.ac.uk](mailto:fritha.langford@ed.ac.uk)
